# Supplementary material
Source: publisher figshare collection journal article supplement (https://frontiersin.figshare.com/ndownloader/files/31683821)
Supplement: Supplementary file [file 31683821]

**Supplementary Table 1 Baseline demographic characteristics of probationers (n=297)**

|                                   | All        | CAU       | BI        | CI        |         |
|-----------------------------------|------------|-----------|-----------|-----------|---------|
|                                   | n =297     | n = 99    | n = 102   | n = 96    | p-value |
|                                   | N (%)      | n (%)     | n (%)     | n (%)     |         |
| <b>Sex</b>                        |            |           |           |           |         |
| Male                              | 143 (51.1) | 52 (55.3) | 46 (47.9) | 45 (50.0) | 0.58    |
| Female                            | 137 (48.9) | 42 (44.7) | 50 (52.1) | 45 (50.0) |         |
| <b>Age</b>                        |            |           |           |           |         |
| 12-19                             | 44 (15.1)  | 21 (21.2) | 12 (12.1) | 11 (11.7) | 0.45    |
| 20-39                             | 136 (46.6) | 43 (43.4) | 47 (47.5) | 46 (48.9) |         |
| 40-59                             | 81 (27.7)  | 23 (23.2) | 31 (31.3) | 27 (28.7) |         |
| ≥60                               | 31 (10.6)  | 12 (12.1) | 9 (9.1)   | 10 (10.6) |         |
| <b>Marital status<sup>b</sup></b> |            |           |           |           |         |
| Not married                       | 154 (52.9) | 57 (57.6) | 46 (46.5) | 51 (54.8) | 0.37    |
| Married                           | 101 (34.7) | 33 (33.3) | 40 (40.4) | 28 (30.1) |         |
| Separated, divorced, widowed      | 36 (12.1)  | 9 (9.1)   | 13 (13.1) | 14 (15.1) |         |
| <b>Education<sup>c</sup></b>      |            |           |           |           |         |
| Primary or below                  | 40 (13.7)  | 12 (12.2) | 13 (13.1) | 15 (16.0) | 0.78    |
| Secondary                         | 195 (67.0) | 70 (71.4) | 66 (66.7) | 59 (62.8) |         |
| Post-secondary or above           | 56 (19.2)  | 16 (16.3) | 20 (20.2) | 20 (21.3) |         |
| <b>Employment<sup>d</sup></b>     |            |           |           |           |         |
| Student                           | 24 (8.4)   | 14 (14.4) | 5 (5.2)   | 5 (5.4)   | 0.12    |
| Employed full-time/part-time      | 186 (65.0) | 63 (64.9) | 63 (65.6) | 60 (64.5) |         |
| Unemployed/retired                | 27 (9.4)   | 9 (9.3)   | 8 (8.3)   | 10 (10.8) |         |
| Homemaker                         | 41 (14.3)  | 9 (9.3)   | 15 (15.6) | 17 (18.3) |         |
| <b>Duration of probation</b>      |            |           |           |           |         |
| Half year or below                | 191 (66.6) | 63 (64.9) | 71 (72.4) | 57 (62.0) | 0.15    |
| Half year to 1 year               | 74 (25.8)  | 22 (22.7) | 24 (24.5) | 28 (30.4) |         |
| 1 year to 1.5 years               | 20 (7.0)   | 10 (10.3) | 3 (3.1)   | 7 (7.6)   |         |
| >1.5 years                        | 2 (0.7)    | 2 (2.1)   | 0 (0.0)   | 0 (0.0)   |         |

CAU= Care-as-usual group, BI = Brief intervention group, CI = Combined intervention group

<sup>a</sup>p-value for the differences among 3 groups at baseline

<sup>b</sup> 6 missing value, n=291; <sup>c</sup> 6 missing value, n=291; <sup>d</sup> 19 missing value, n=278

**Supplementary Table 2 The within-group difference in physical activity, fitness performances, psychological well-being and quality of life at 1- and 3-month follow-up in 3 groups: Complete-case analysis**

|                                                                | CAU<br>(n=99)                 |                | BI<br>(n=102)                 |                | CI<br>(n=96)                 |                |
|----------------------------------------------------------------|-------------------------------|----------------|-------------------------------|----------------|------------------------------|----------------|
|                                                                | Mean $\pm$ SD                 | Cohen's d      | Mean $\pm$ SD                 | Cohen's d      | Mean $\pm$ SD                | Cohen's d      |
| <b>Physical activity</b>                                       |                               |                |                               |                |                              |                |
| <b>Days spent engaging in physical activity while seated</b>   |                               |                |                               |                |                              |                |
| T1                                                             | 1.9 $\pm$ 2.4 <sup>#</sup>    |                | 2.5 $\pm$ 2.6 <sup>#</sup>    |                | 2.2 $\pm$ 2.6 <sup>#</sup>   |                |
| T2, (T2 vs T1)                                                 | 2.6 $\pm$ 2.7                 | 0.26**         | 2.9 $\pm$ 2.4                 | 0.16           | 2.9 $\pm$ 2.4                | 0.29*          |
| T3, (T3 vs T1)                                                 | 2.4 $\pm$ 2.4                 | 0.19*          | 3.3 $\pm$ 2.5                 | 0.32**         | 2.8 $\pm$ 2.5                | 0.26*          |
| <b>Days spent engaging in physical activity while standing</b> |                               |                |                               |                |                              |                |
| T1                                                             | 2.2 $\pm$ 2.5                 |                | 2.5 $\pm$ 2.6 <sup>#</sup>    |                | 2.3 $\pm$ 2.6 <sup>###</sup> |                |
| T2, (T2 vs T1)                                                 | 2.3 $\pm$ 2.5                 | 0.04           | 3.0 $\pm$ 2.5                 | 0.19           | 3.2 $\pm$ 2.5                | 0.37***        |
| T3, (T3 vs T1)                                                 | 2.4 $\pm$ 2.4                 | 0.10           | 3.3 $\pm$ 2.5                 | 0.32*          | 3.1 $\pm$ 2.5                | 0.33**         |
| <b>Days spent engaging in moderate physical activity</b>       |                               |                |                               |                |                              |                |
| T1                                                             | 2.3 $\pm$ 2.5                 |                | 2.5 $\pm$ 2.6                 |                | 1.9 $\pm$ 2.2 <sup>###</sup> |                |
| T2, (T2 vs T1)                                                 | 2.1 $\pm$ 2.4                 | -0.08          | 2.3 $\pm$ 2.4                 | -0.09          | 3.1 $\pm$ 2.4                | 0.52***        |
| T3, (T3 vs T1)                                                 | 2.4 $\pm$ 2.5                 | 0.04           | 2.2 $\pm$ 2.2                 | -0.15          | 2.8 $\pm$ 2.3                | 0.38***        |
| <b>Days spent engaging in vigorous physical activity</b>       |                               |                |                               |                |                              |                |
| T1                                                             | 1.3 $\pm$ 1.9                 |                | 1.4 $\pm$ 1.9                 |                | 1.1 $\pm$ 1.6 <sup>#</sup>   |                |
| T2, (T2 vs T1)                                                 | 1.2 $\pm$ 1.8                 | -0.06          | 1.6 $\pm$ 2.0                 | 0.11           | 1.6 $\pm$ 1.9                | 0.33**         |
| T3, (T3 vs T1)                                                 | 1.1 $\pm$ 1.5                 | -0.11          | 1.6 $\pm$ 2.0                 | 0.10           | 1.5 $\pm$ 1.8                | 0.23*          |
| <b>Physical fitness</b>                                        |                               |                |                               |                |                              |                |
| <b>Single-leg stand test, seconds</b>                          |                               |                |                               |                |                              |                |
| T1                                                             | 86.0 $\pm$ 39.9               |                | 91.4 $\pm$ 40.3               |                | 84.2 $\pm$ 39.8              |                |
| T2, (T2 vs T1)                                                 | 85.4 $\pm$ 38.0               | -0.02          | 90.4 $\pm$ 38.0               | -0.02          | 84.1 $\pm$ 38.9              | 0.00           |
| T3, (T3 vs T1)                                                 | 84.5 $\pm$ 38.3               | -0.04          | 90.7 $\pm$ 38.2               | -0.04          | 82.7 $\pm$ 39.9              | -0.01          |
| <b>30-s chair stand test, number of stands</b>                 |                               |                |                               |                |                              |                |
| T1                                                             | 19.0 $\pm$ 7.7 <sup>###</sup> |                | 18.6 $\pm$ 7.7 <sup>###</sup> |                | 22.0 $\pm$ 9.0 <sup>#</sup>  |                |
| T2, (T2 vs T1)                                                 | 21.0 $\pm$ 9.1                | <b>0.24***</b> | 21.3 $\pm$ 8.2                | <b>0.33***</b> | 23.3 $\pm$ 9.8               | <b>0.13*</b>   |
| T3, (T3 vs T1)                                                 | 21.9 $\pm$ 9.2                | <b>0.34***</b> | 21.8 $\pm$ 8.5                | <b>0.39***</b> | 23.0 $\pm$ 8.7               | <b>0.12*</b>   |
| <b>Psychological well-being</b>                                |                               |                |                               |                |                              |                |
| <b>Self-esteem</b>                                             |                               |                |                               |                |                              |                |
| T1                                                             | 27.0 $\pm$ 4.6                |                | 27.0 $\pm$ 3.6 <sup>#</sup>   |                | 27.8 $\pm$ 4.1               |                |
| T2, (T2 vs T1)                                                 | 27.3 $\pm$ 4.6                | 0.08           | 27.6 $\pm$ 3.5                | <b>0.16**</b>  | 27.8 $\pm$ 4.6               | 0.00           |
| T3, (T3 vs T1)                                                 | 27.1 $\pm$ 4.9                | 0.02           | 27.6 $\pm$ 3.7                | 0.14           | 27.9 $\pm$ 4.2               | 0.01           |
| <b>Subjective happiness</b>                                    |                               |                |                               |                |                              |                |
| T1                                                             | 17.1 $\pm$ 4.8                |                | 17.6 $\pm$ 4.1 <sup>###</sup> |                | 17.7 $\pm$ 4.8               |                |
| T2, (T2 vs T1)                                                 | 17.6 $\pm$ 4.7                | 0.11           | 17.9 $\pm$ 4.0                | 0.07           | 18.1 $\pm$ 4.2               | 0.10           |
| T3, (T3 vs T1)                                                 | 17.7 $\pm$ 4.2                | 0.15           | 18.8 $\pm$ 4.1                | <b>0.31***</b> | 18.1 $\pm$ 4.3               | 0.10           |
| <b>Anxiety and depression</b>                                  |                               |                |                               |                |                              |                |
| T1                                                             | 2.4 $\pm$ 2.6                 |                | 3.0 $\pm$ 2.9                 |                | 3.0 $\pm$ 3.1 <sup>#</sup>   |                |
| T2, (T2 vs T1)                                                 | 2.6 $\pm$ 3.0                 | 0.08           | 2.7 $\pm$ 3.0                 | -0.07          | 2.2 $\pm$ 2.3                | <b>-0.29**</b> |
| T3, (T3 vs T1)                                                 | 2.4 $\pm$ 2.6                 | 0.03           | 2.7 $\pm$ 2.9                 | -0.10          | 2.4 $\pm$ 2.6                | <b>-0.21*</b>  |
| <b>Life satisfaction</b>                                       |                               |                |                               |                |                              |                |
| T1                                                             | 20.9 $\pm$ 7.3                |                | 21.9 $\pm$ 7.1                |                | 21.8 $\pm$ 6.9               |                |
| T2, (T2 vs T1)                                                 | 21.7 $\pm$ 7.4                | 0.10           | 21.9 $\pm$ 6.5                | 0.00           | 23.1 $\pm$ 6.7               | <b>0.19*</b>   |
| T3, (T3 vs T1)                                                 | 21.8 $\pm$ 7.3                | 0.12           | 22.9 $\pm$ 6.1                | 0.15           | 23.1 $\pm$ 6.8               | 0.20           |
| <b>Quality of life</b>                                         |                               |                |                               |                |                              |                |
| <b>Physical quality of life</b>                                |                               |                |                               |                |                              |                |
| T1                                                             | 47.4 $\pm$ 8.8                |                | 47.6 $\pm$ 8.4                |                | 46.5 $\pm$ 8.8               |                |
| T2, (T2 vs T1)                                                 | 46.9 $\pm$ 8.4                | -0.05          | 47.9 $\pm$ 8.6                | 0.04           | 47.5 $\pm$ 8.0               | 0.12           |
| T3, (T3 vs T1)                                                 | 48.2 $\pm$ 7.9                | 0.10           | 47.4 $\pm$ 8.1                | -0.02          | 47.0 $\pm$ 8.2               | 0.06           |
| <b>Mental quality of life</b>                                  |                               |                |                               |                |                              |                |
| T1                                                             | 44.5 $\pm$ 9.8 <sup>#</sup>   |                | 44.2 $\pm$ 8.4                |                | 45.1 $\pm$ 9.0               |                |
| T2, (T2 vs T1)                                                 | 46.8 $\pm$ 10.1               | <b>0.23**</b>  | 45.1 $\pm$ 9.3                | 0.11           | 47.0 $\pm$ 9.1               | <b>0.22*</b>   |
| T3, (T3 vs T1)                                                 | 45.5 $\pm$ 10.3               | 0.10           | 45.2 $\pm$ 8.9                | 0.12           | 45.9 $\pm$ 8.7               | 0.09           |

T1 = baseline, T2 = 1 month, T3 = 3 months

Repeated Measures Analysis of Variance and paired t-test to compare parametric data among three timepoints and between two timepoints, respectively.

T2 vs T1 = values at 1 month versus values at baseline; T3 vs T1 = values at 3-months versus values at baseline

Difference among three timepoints: <sup>#</sup>p < .05, <sup>##</sup>p<0.01, <sup>###</sup>p<0.001; Difference between two timepoints: \*p < 0.05, \*\*p < 0.01, \*\*\*p < 0.001

Effect size (Cohen's d): small = 0.20, moderate = 0.50, and large = 0.80

**Supplementary Table 3 The within-group difference in family well-being and relationship with probation officers at 1- and 3-month follow-up in 3 groups: Complete-case analysis**

|                                                                       | CAU<br>(n=99)                |                | BI<br>(n=102)                |                | CI<br>(n=96)                 |                |
|-----------------------------------------------------------------------|------------------------------|----------------|------------------------------|----------------|------------------------------|----------------|
|                                                                       | Mean $\pm$ SD                | Cohen's d      | Mean $\pm$ SD                | Cohen's d      | Mean $\pm$ SD                | Cohen's d      |
| <b>Family communication</b>                                           |                              |                |                              |                |                              |                |
| <b>Did physical activity with family members, score</b>               |                              |                |                              |                |                              |                |
| T1                                                                    | 1.7 $\pm$ 0.9 <sup>###</sup> |                | 1.8 $\pm$ 1.0 <sup>###</sup> |                | 1.8 $\pm$ 0.9 <sup>###</sup> |                |
| T2, (T2 vs T1)                                                        | 1.9 $\pm$ 1.0                | <b>0.19*</b>   | 2.7 $\pm$ 1.0                | <b>0.86***</b> | 2.6 $\pm$ 1.0                | <b>0.84***</b> |
| T3, (T3 vs T1)                                                        | 2.1 $\pm$ 1.0                | <b>0.40***</b> | 2.8 $\pm$ 1.1                | <b>0.89***</b> | 2.6 $\pm$ 0.9                | <b>0.79***</b> |
| <b>Praised family members to do physical activity, score</b>          |                              |                |                              |                |                              |                |
| T1                                                                    | 2.4 $\pm$ 1.0                |                | 2.3 $\pm$ 1.0 <sup>###</sup> |                | 2.6 $\pm$ 1.1 <sup>##</sup>  |                |
| T2, (T2 vs T1)                                                        | 2.5 $\pm$ 1.0                | 0.11           | 2.8 $\pm$ 1.0                | <b>0.50***</b> | 2.9 $\pm$ 0.9                | <b>0.36**</b>  |
| T3, (T3 vs T1)                                                        | 2.6 $\pm$ 0.9                | <b>0.20*</b>   | 2.9 $\pm$ 0.9                | <b>0.60***</b> | 3.0 $\pm$ 1.0                | <b>0.39**</b>  |
| <b>Discussing the importance of exercises with family, score</b>      |                              |                |                              |                |                              |                |
| T1                                                                    | 2.7 $\pm$ 1.2                |                | 2.6 $\pm$ 1.2 <sup>###</sup> |                | 2.8 $\pm$ 1.1 <sup>#</sup>   |                |
| T2, (T2 vs T1)                                                        | 2.7 $\pm$ 1.1                | -0.04          | 2.9 $\pm$ 1.0                | <b>0.26**</b>  | 3.0 $\pm$ 1.0                | 0.21           |
| T3, (T3 vs T1)                                                        | 2.7 $\pm$ 1.1                | -0.05          | 3.1 $\pm$ 0.9                | <b>0.47***</b> | 3.2 $\pm$ 1.0                | <b>0.32**</b>  |
| <b>Expressed verbal appreciation to family members, score</b>         |                              |                |                              |                |                              |                |
| T1                                                                    | 2.9 $\pm$ 1.1                |                | 3.0 $\pm$ 1.1 <sup>#</sup>   |                | 3.0 $\pm$ 1.0 <sup>###</sup> |                |
| T2, (T2 vs T1)                                                        | 2.8 $\pm$ 1.1                | -0.10          | 3.0 $\pm$ 1.0                | 0.07           | 3.3 $\pm$ 0.9                | <b>0.33**</b>  |
| T3, (T3 vs T1)                                                        | 2.9 $\pm$ 1.0                | 0.03           | 3.2 $\pm$ 0.9                | <b>0.27**</b>  | 3.4 $\pm$ 1.0                | <b>0.42***</b> |
| <b>Expressed appreciation through action to family members, score</b> |                              |                |                              |                |                              |                |
| T1                                                                    | 2.9 $\pm$ 1.0                |                | 3.1 $\pm$ 1.1                |                | 3.1 $\pm$ 1.1 <sup>##</sup>  |                |
| T2, (T2 vs T1)                                                        | 2.9 $\pm$ 1.0                | 0.01           | 3.1 $\pm$ 0.9                | -0.04          | 3.4 $\pm$ 1.0                | <b>0.30*</b>   |
| T3, (T3 vs T1)                                                        | 2.8 $\pm$ 1.1                | -0.08          | 3.3 $\pm$ 1.0                | 0.18           | 3.4 $\pm$ 1.1                | <b>0.35**</b>  |
| <b>Family well-being, score</b>                                       |                              |                |                              |                |                              |                |
| T1                                                                    | 6.3 $\pm$ 2.5                |                | 6.5 $\pm$ 2.5                |                | 6.4 $\pm$ 2.4 <sup>##</sup>  |                |
| T2, (T2 vs T1)                                                        | 6.1 $\pm$ 2.6                | -0.10          | 6.7 $\pm$ 2.5                | 0.06           | 7.2 $\pm$ 2.3                | <b>0.33***</b> |
| T3, (T3 vs T1)                                                        | 6.0 $\pm$ 2.8                | -0.11          | 6.9 $\pm$ 2.4                | 0.16           | 6.9 $\pm$ 2.4                | <b>0.22*</b>   |
| <b>Relationship with probation officers, score</b>                    |                              |                |                              |                |                              |                |
| T1                                                                    | 4.3 $\pm$ 0.7                |                | 4.3 $\pm$ 0.7 <sup>#</sup>   |                | 4.3 $\pm$ 0.7 <sup>##</sup>  |                |
| T2, (T2 vs T1)                                                        | 4.3 $\pm$ 0.7                | -0.03          | 4.4 $\pm$ 0.6                | 0.09           | 4.5 $\pm$ 0.6                | 0.18           |
| T3, (T3 vs T1)                                                        | 4.3 $\pm$ 0.7                | -0.09          | 4.5 $\pm$ 0.6                | <b>0.21*</b>   | 4.5 $\pm$ 0.6                | <b>0.31**</b>  |

T1 = baseline, T2 = 1 month, T3 = 3 months

T2 vs T1 = values at 1-month versus values at baseline; T3 vs T1 = values at 3-months versus values at baseline

Repeated Measures Analysis of Variance and paired t-test to compare parametric data among three timepoints and between two timepoints, respectively. Difference among three timepoints: <sup>#</sup>p < .05, <sup>##</sup>p<0.01, <sup>###</sup>p<0.001; Difference between two timepoints: \*p < 0.05, \*\*p < 0.01, \*\*\*p < 0.001

Effect size (Cohen's d): small =0.02, moderate =0.50, large = 0.80.

**Supplementary Table 4 The between-group difference in the changes in physical fitness, psychological well-being, and quality of life at 1- and 3-month follow-up in 3 groups: Complete case analysis**

|                                                                | BI vs CAU                  |           | CI vs CAU                  |           | CI vs BI                   |           |
|----------------------------------------------------------------|----------------------------|-----------|----------------------------|-----------|----------------------------|-----------|
|                                                                | Mean difference<br>(95%CI) | Cohen's d | Mean difference<br>(95%CI) | Cohen's d | Mean difference<br>(95%CI) | Cohen's d |
| <b>Difference in the changes at 1 month</b>                    |                            |           |                            |           |                            |           |
| <b>Physical activity</b>                                       |                            |           |                            |           |                            |           |
| Days spent engaging in Zero-time exercise while seated, days   | 0.07 (-0.74, 0.87)         | 0.03      | 0.18 (-0.63, 0.99)         | 0.08      | 0.11 (-0.70, 0.92)         | 0.05      |
| Days spent engaging in Zero-time exercise while standing, days | 0.62 (-0.15, 1.39)         | 0.28      | 0.88 (0.10, 1.65)          | 0.40*     | 0.26 (-0.52, 1.03)         | 0.12      |
| Days spent engaging in moderate physical activity, days        | 0.18 (-0.54, 0.90)         | 0.09      | 1.42 (0.70, 2.15)          | 0.70***   | 1.25 (0.52, 1.98)          | 0.62***   |
| Days spent engaging in vigorous physical activity, days        | 0.39 (-0.21, 0.99)         | 0.23      | 0.65 (0.05, 1.25)          | 0.39*     | 0.26 (-0.35, 0.86)         | 0.15      |
| <b>Physical fitness</b>                                        |                            |           |                            |           |                            |           |
| Single-leg stand test, second                                  | 1.49 (-7.73, 10.71)        | 0.06      | 0.28 (-9.12, 9.69)         | 0.01      | -1.21 (-10.61, 8.19)       | -0.05     |
| 30-s chair stand test, no. of stand                            | 0.42 (-1.36, 2.20)         | 0.08      | -0.71 (-2.56, 1.15)        | -0.14     | -1.13 (-2.97, 0.72)        | -0.22     |
| <b>Psychological well-being</b>                                |                            |           |                            |           |                            |           |
| Self-esteem                                                    | 0.21 (-0.82, 1.24)         | 0.07      | -0.18 (-1.23, 0.87)        | -0.06     | -0.39 (-1.44, 0.66)        | -0.13     |
| Subjective happiness                                           | 0.06 (-1.01, 1.12)         | 0.02      | 0.21 (-0.88, 1.30)         | 0.07      | 0.15 (-0.93, 1.23)         | 0.05      |
| Anxiety and depression                                         | -0.23 (-1.07, 0.62)        | -0.09     | -0.82 (-1.68, 0.04)        | -0.35     | -0.60 (-1.45, 0.26)        | -0.25     |
| Life satisfaction                                              | -0.06 (-1.75, 1.63)        | -0.01     | 0.95 (-0.77, 2.66)         | 0.20      | 1.01 (-0.69, 2.71)         | 0.21      |
| <b>Quality of life</b>                                         |                            |           |                            |           |                            |           |
| Physical quality of life                                       | 0.86 (-1.24, 2.96)         | 0.14      | 1.39 (-0.73, 3.52)         | 0.24      | 0.54 (-1.61, 2.68)         | 0.09      |
| Mental quality of life                                         | -1.54 (-4.13, 1.06)        | -0.21     | -0.26 (-2.90, 2.37)        | -0.04     | 1.27 (-1.38, 3.92)         | 0.17      |
| <b>Family communication</b>                                    |                            |           |                            |           |                            |           |
| Did physical activity with family members, score               | 0.77 (0.45, 1.08)          | 0.86***   | 0.71 (0.39, 1.03)          | 0.79***   | -0.05 (-0.37, 0.26)        | -0.06     |
| Praised family members to do physical activity, score          | 0.37 (0.06, 0.68)          | 0.42*     | 0.40 (0.08, 0.71)          | 0.45**    | 0.03 (-0.29, 0.34)         | 0.03      |
| Expressed verbal appreciation to family members, score         | 0.22 (-0.08, 0.52)         | 0.26      | 0.52 (0.22, 0.82)          | 0.61***   | 0.30 (0.00, 0.60)          | 0.35      |
| Expressed appreciation to family members through action, score | 0.12 (-0.19, 0.42)         | 0.13      | 0.42 (0.11, 0.72)          | 0.48**    | 0.30 (-0.01, 0.61)         | 0.35      |
| <b>Family well-being</b>                                       | 0.61 (-0.02, 1.25)         | 0.34      | 1.17 (0.53, 1.81)          | 0.65***   | 0.56 (-0.09, 1.20)         | 0.31      |
| <b>Relationship with probation officers</b>                    | 0.09 (-0.08, 0.26)         | 0.19      | 0.12 (-0.05, 0.29)         | 0.25      | 0.03 (-0.14, 0.20)         | 0.06      |
| <b>Difference in the changes at 3 months</b>                   |                            |           |                            |           |                            |           |
| <b>Physical activity</b>                                       |                            |           |                            |           |                            |           |
| Days spent engaging in Zero-time exercise while seated, days   | 0.70 (-0.10, 1.50)         | 0.31      | 0.34 (-0.46, 1.15)         | 0.15      | -0.36 (-1.16, 0.44)        | -0.16     |
| Days spent engaging in Zero-time exercise while standing, days | 0.75 (-0.03, 1.54)         | 0.34      | 0.60 (-0.19, 1.40)         | 0.27      | -0.15 (-0.95, 0.64)        | -0.07     |
| Days spent engaging in moderate physical activity, days        | -0.37 (-1.11, 0.38)        | -0.18     | 0.66 (-0.09, 1.40)         | 0.31      | 1.03 (0.27, 1.78)          | 0.49**    |
| Days spent engaging in vigorous physical activity, days        | 0.46 (-0.11, 1.03)         | 0.29      | 0.53 (-0.04, 1.10)         | 0.33      | 0.07 (-0.50, 0.65)         | 0.05      |
| <b>Physical fitness</b>                                        |                            |           |                            |           |                            |           |
| Single-leg stand test, second                                  | 0.95 (-8.87, 10.76)        | 0.03      | -0.15 (-10.12, 9.83)       | -0.01     | -1.09 (-11.06, 8.87)       | -0.04     |
| 30-s chair stand test, number of stand                         | 0.01 (-1.78, 1.79)         | 0.00      | -1.54 (-3.39, 0.32)        | -0.30     | -1.54 (-3.39, 0.31)        | -0.30     |
| <b>Psychological well-being</b>                                |                            |           |                            |           |                            |           |
| Self-esteem                                                    | 0.52 (-0.52, 1.55)         | 0.18      | 0.28 (-0.78, 1.33)         | 0.09      | -0.24 (-1.29, 0.81)        | -0.08     |
| Subjective happiness                                           | 0.77 (-0.33, 1.88)         | 0.25      | 0.16 (-0.97, 1.29)         | 0.05      | -0.61 (-1.73, 0.50)        | -0.20     |
| Anxiety and depression                                         | -0.10 (-0.92, 0.71)        | -0.04     | -0.35 (-1.18, 0.48)        | -0.15     | -0.24 (-1.07, 0.58)        | -0.11     |
| Life satisfaction                                              | 0.38 (-1.40, 2.16)         | 0.07      | 0.95 (-0.86, 2.75)         | 0.19      | 0.57 (-1.22, 2.36)         | 0.11      |

|                                                                |                     |         |                     |              |                     |       |
|----------------------------------------------------------------|---------------------|---------|---------------------|--------------|---------------------|-------|
| <b>Quality of life</b>                                         |                     |         |                     |              |                     |       |
| Physical quality of life                                       | -0.32 (-2.55, 1.91) | -0.05   | 0.05 (-2.21, 2.31)  | 0.01         | 0.37 (-1.91, 2.64)  | 0.06  |
| Mental quality of life                                         | -0.12 (-2.82, 2.58) | -0.02   | -0.19 (-2.93, 2.55) | -0.03        | -0.08 (-2.83, 2.68) | -0.01 |
| <b>Family communication</b>                                    |                     |         |                     |              |                     |       |
| Did physical activity with family members, score               | 0.64 (0.29, 0.99)   | 0.64*** | 0.44 (0.09, 0.80)   | 0.45**       | -0.20 (-0.55, 0.16) | -0.20 |
| Praised family members to do physical activity, score          | 0.37 (0.05, 0.69)   | 0.41*   | 0.40 (0.08, 0.72)   | 0.45**       | 0.03 (-0.29, 0.35)  | 0.04  |
| Expressed verbal appreciation to family members, score         | 0.25 (-0.06, 0.56)  | 0.29    | 0.48 (0.17, 0.80)   | 0.55**       | 0.23 (-0.09, 0.54)  | 0.26  |
| Expressed appreciation to family members through action, score | 0.35 (0.02, 0.69)   | 0.37*   | 0.57 (0.23, 0.91)   | 0.60***      | 0.22 (-0.12, 0.56)  | 0.23  |
| <b>Family well-being, score</b>                                | 0.94 (0.20, 1.68)   | 0.45**  | 0.96 (0.21, 1.71)   | 0.46**       | 0.02 (-0.73, 0.78)  | 0.01  |
| <b>Relationship with probation officers</b>                    | 0.16 (-0.01, 0.34)  | 0.32    | 0.21 (0.03, 0.39)   | <b>0.41*</b> | 0.04 (-0.14, 0.22)  | 0.09  |

CAU= Care-as-usual group, BI = Brief intervention group, CI = Combined intervention group

Linear mixed model was adopted to examine the between-group difference

Effect size (Cohen's d): small =0.02, moderate =0.50, large = 0.80; \* p <0.01
